# Supplementary material
Source: Springer Nature journal article supplement (https://www.springermedizin.de/resource/supplementary/13023_2013_668_MOESM10_ESM.pdf/9642528)

**A**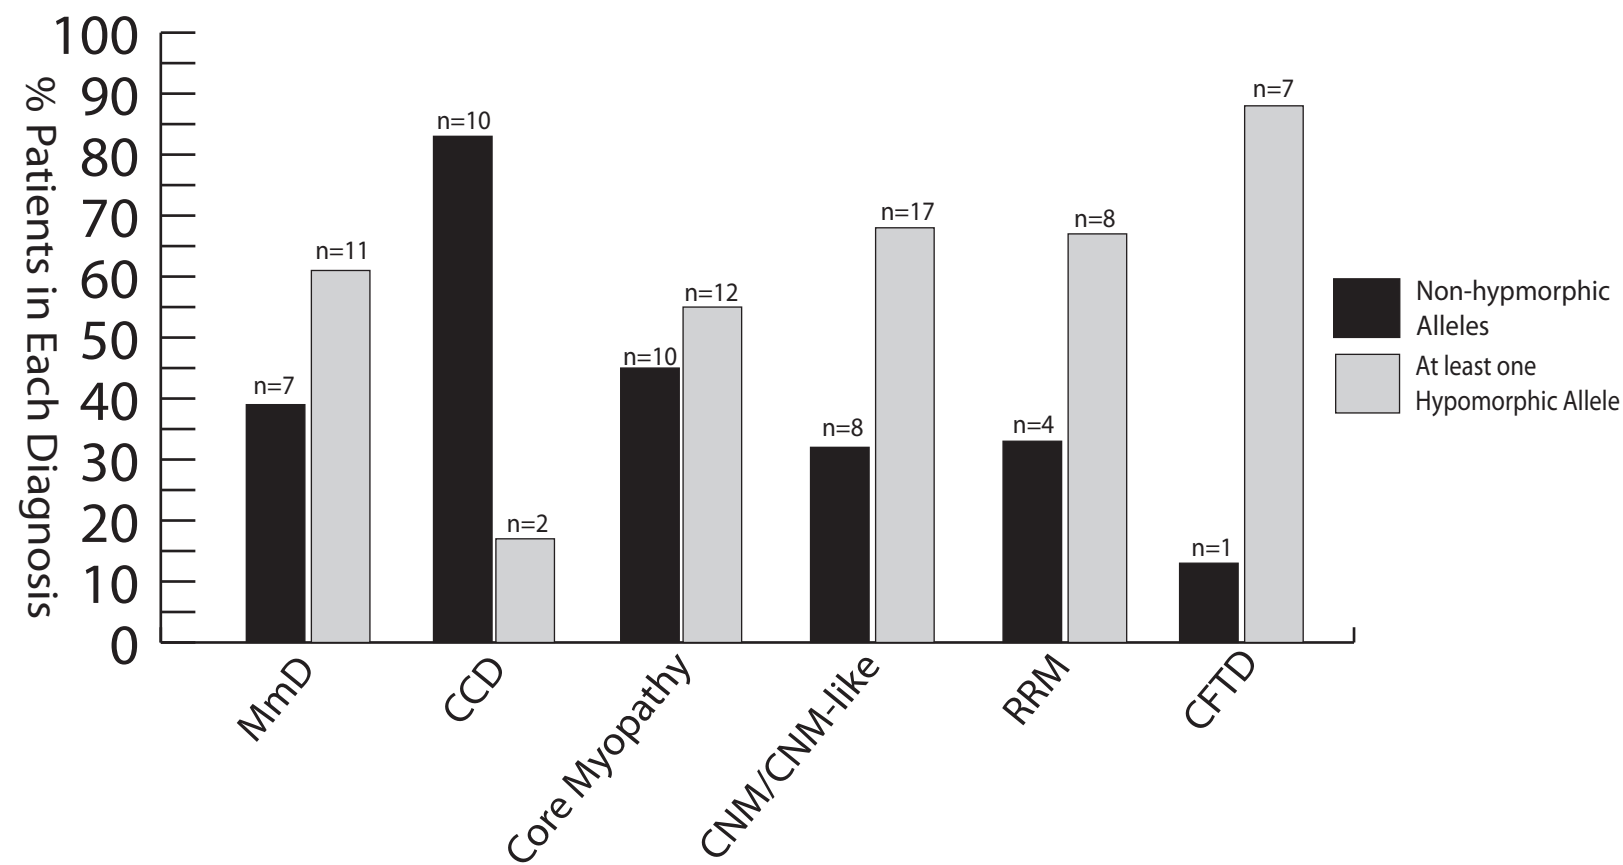**B**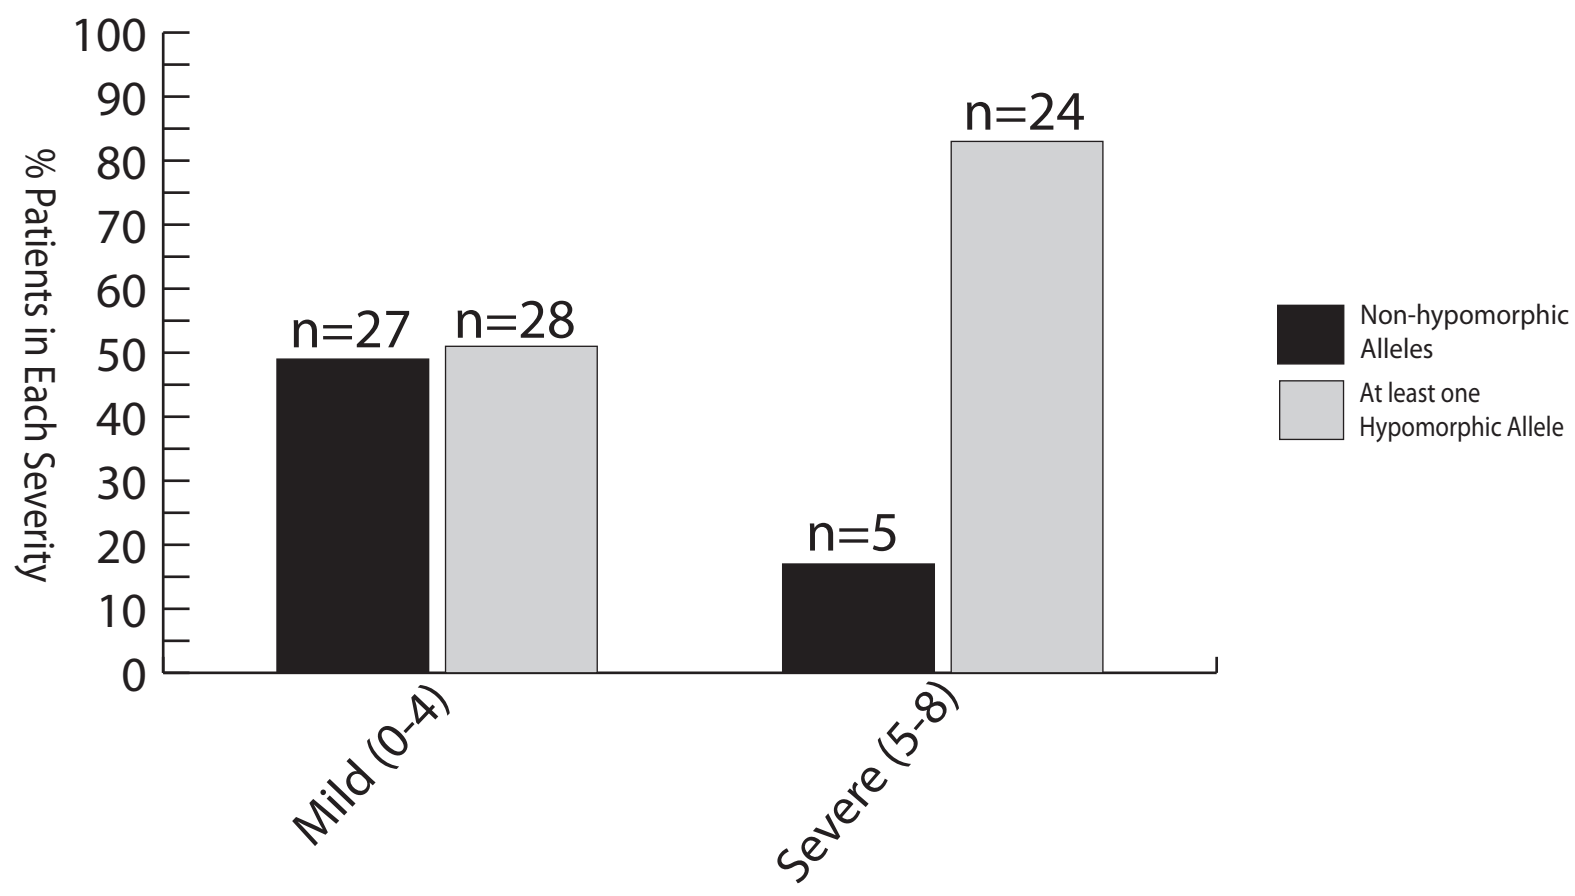

Supplement: MOESM10 [file 9642528]
